# Supplementary material
Source: MDPI journal article supplement (https://www.mdpi.com/2311-7524/10/4/307)
Supplement: s1 [file s1]

**A: Coding sequences of CsTDC genes.**

**>CsaV3\_1G036910**

ATGGGAAGCATCAACAATGAAATCGCTGACATCGACTTTAATGTCTGCAACCCATTAGA  
TCCAGAAGAATTCAGAATTCAGCACATAAAGTTGTAGATTTATAGCTGATTATTACA  
AAAGGATTGAACAATTCCCAGTTGTTAGCCAAGTTGTTCCAGGCTATCTCCAAAAAAG  
CATACCCCAAGATTCTGTTCCAAATTCTCCTGAATCTTTAGAATCCATTCTTCAAGATGT  
TCGCCGATATGTCGTTCCGGGTATTACTCATTGGCAAAGCCCAAACTTTTTGTCTATTT  
TCCTGCTAGTAATAGCACTGCAGGTCTTCTTGGAGAAATGCTAGGCACTGCCTTCAATG  
TCGTCGGTTTTAACTGGCTTTCGTCCCCCGCTGTCACCGAGCTTGAAATGTTGGTGCTT  
GATTGGTTTGGTGAGATGCTTAACCTGCCCAAAGCCTTTATGTTTTCCGGTGGCTGCGG  
TGGTGGCGGCGTTCTACAAGGGACTACTTGTGAAGCGATTTTATGTACATTGGTGGCTG  
CAAGGGACATGAACTTAAAGAGATTGGAAGAGAAAAGATGAGTAAGCTTGTTGTTTA  
TGGTTCTGATCAAACATCATATGTCCTTACAAAAGGCCTTACAGGTCGCAGGCTTTTCTT  
TGGAATTTTTCGAGTCATTAAGACAACAAAATCAGAGTCATTTGGACTGTCTCCAAC  
CTCTCTAAAAATGGCAATTCAATCCGACATCCAAAAGGCTTTGTCCCACTGTACCTTT  
GTGCAACTATCGGAACGACTTCAACGAACGCGGTGACCCACTTGACTCACTTTGCGA  
TATAGCACAAACAAAACGGAATTTGGGTTCATGTGGACGCTGCATATGCAGGAAGCGCT  
TGCATTTGCCCCGAGTTTCGACATTTTATGAATGGCATCGAGAAGGCAAATTCGTTTCA  
CTTGAATGCGCATAAATGGTTCTTCTCGGCGCCAGACTGTTGTTGCTTGTGGCTGAAGG  
ATTCGTCCGCGTTGCGAACTCTCTCTCTGTGAACCTACGTATTTGAAAAATAGGGCA  
ACTGATTCGGGTGAAGTAGTGGACTACAAAGACTGGCAGATTACGCTGAGTAGAAGGT  
TTCGAGCAATGAAGTTATGGGTGTGATGAAAAGCTATGGAGTGGCAAATTTGAGGAA  
GTTTTTGAGAAGCCATGTGAAAATGGCCAAGATTTTGGAGGGGCTTGTGGAGAGGGAT  
GAGAGGTTTGAGGTTGCGGTTCCAAGGAATTTCCGGGTGGTTTGTTCGATTGTCGCT  
CGATGAAGACCAGAAGTCGAATATGATTAACCTTGAAATTGTTGGAGGGAATTAACAAG  
ACCGGAAGAGTTTACATGACACATGCAGTTGTTGAGGGAATGTATTTGATTTCGATTTGC  
CGTCGGCGGGACGATGACGGAGGAGCGACATGTCGTCATGGCATGGAAGCTCGTGCA  
AGAAGTAGCCGAAAAGGTCTTGGAGGGGGTTTAA

**> CsaV3\_3G028450**

ATGGATAATGAATTGAAGCCGATGGATGCTGAGCAACTCAGAGAACATGCTCATAAAAT  
GGTGGATTTCAATTGCTGATTATTACAAAACATCGAGGATTTCCCGTGCTCAGCCAAG  
TAGAGCCTGGTTATCTTCAAAATCTTCTACCAGAATCTGCACCTCTTAATCCAGAATCTC  
TGCAAAGTGTTCTTGATGATGTCCAGAAAAAGATTTTCCGGGTGTAACACATTGGCA  
GAGTCCCAACTACTTTGCTTATTATCCTTCTAACAGTAGCATTGCTGGATTTCTTGGGGA  
AATGCTCAGTGCAGCTTTCAATGTGATCGGTTTTAGTTGGGTAACCTTCTCCAGCTGCTA  
CAGAACTTGAGATGATAGTTCTTGATTGGCTTGCCAAATTATTGAAGCTGCCCCGATGAC  
TTTCTCTCGTCAGGAAACGGCGGGGGAGTAATACAGGGAAGTCCAGTGAAGCTGTTT  
TAGTTGTGCTACTGGCTGCTCGTGATCGAGCTCTAAGAAGATTTGGAAGAGATTACCTT  
AAGAACTAGTTGTTTATGCATCTGATCAAACGCACTCTGCTTTACAAAAGGCATGCCA  
GATTGGAGGGATTCATCCTGAGAATTGCAGATGGTTGAAAGCAGATATTTCTACCAATT  
ATGCCCTTTCTCCCGATGTTCTTTCCGAAGAAGTTTACGTGATACAGCCAGAGGATTA  
ATTCCATTTTTCTTATGTGCTACAGTTGGAAGTACATCATCAACAGCTGTAGACCCTCTC  
CCTGAACTAGGAACTATTGCTAAGAGGCACGAAATGTGGTTTTACGTTGATGCTGCTTA  
TGCTGGAAGTGCATGTGTATGTCCTGAATATCGACAGTACATTGACGGTGTGGAAGAAG

CTGACTCATTCAATATGAATCTTCACAAGTGGTTCTTGACAAACTTCGATTGTTTCAGCA  
CTGTGGATCAAGGACCGACATGCCTTGATCCGGTCTCTTTCTACGAATCCTGAGTTCTT  
GAAGAACAAAGCCTCTGAAGCAGAACTGGTTGTGGATTACAAAGATTGGCAAATTCC  
ACTTGGGCGCCGTTTTAGATCATTGAAAGTCTGGATGGTGTACGACTGTATGGTACAG  
AAAACCTTCAAAAATACATTAGAAATCATATCAGTTTGGCTGAACGTTTTGAAGCACTT  
GTACGTGAAGATCCAAGGTTTGAGATTGTTACACCAAGGATTTTCTCTCTAGTATGTTTT  
CGCCTTCTGCCATCTCGCAAAAATGAAGATGGTGGCAACAGACTAAATCAAAGCCTAT  
TAGATGCTGTAAATGCTAGCGGAAATATTTTCATTTCTCACACGGTTTTATCAGGAAAAT  
ACATTCTTCGATTTGCAGTAGGGGCGCCGTTGACAGAGGAAAAGCATATTAATTCTGCT  
TGGAAGTTATTGCAAGATGTGGCTTCCACTTTGCTTGCAATTTGA

**B: The protein sequences of CsTDC genes**

**>CsaV3\_1G036910**

MGSINNEIADIDFNVVNPLDPEEFRIQAHKVVDIFIADYYKRIEQFPVVSQVVPGYLQKSIPQ  
DSVPNSPESLESILQDVRRYVVPGITHWQSPNFFAYFPASNSTAGLLGEMLGTA FN VVGFN  
WLSSPAVTELEMLVLDFWGEMLNLPKAFMFSGGCGGGGVLQGTTCEAILCTLVAARDMK  
LKEIGREKMSKLVVYGSQDTHMSLQKALQVAGFSLENFRVIKTTKSESFGLSPTSLKMAIQ  
SDIQKGFVPLYLCATIGTTSTNAVDPLDSLCDIAQQNGIWHVHDAAYAGSACICPEFRHFM  
NGIEKANSFSLNAHKWFFSAPDCCCLWLKDSSALRNSLSVNPTYLKNRATDSGEVVYDK  
DWQITLSRRFRAMKLWVVMKSYGVANLRKFLRSHVKMAKIFEGIVERDERFEVAVPRNF  
GLVCFRLSLDEDQKSNMINLKLLEGINKTGRVYMTHAVVEGMYLIRFAVGGTMTEERHV  
VMAWKLVQEVAEKVLEGV

**> CsaV3\_3G028450**

MDNELKPMDAEQLREHAHKMVVDIFIADYYKNIEDFPVLSQVEPGYLQNLLPESAPLNPESEL  
QSVLDDVQKKIFPGVTHWQSPNYFAYYPSNSSIAGFLGEMLSAAFNVIGFSWVTSPAATEL  
EMIVLDWLAKLLKLDDFLSSGNGGGVIQGTASEAVLVVLLAARDRALRRFGKDYLLKL  
VVYASDQTHSALQKACQIGGIHPENCRWLKADISTNYALSPDVLSEELSRDTARGLIPFFLC  
ATVGTTSSSTAVDPLPELGTIAKRHEMWFHVDAAAYAGSACVCPEYRQYIDGVEEADSFNMN  
LHKWFLTNFDCSALWIKDRHALIRSLSTNPEFLKNKASEAELVDYKDWQIPLGRRFRSL  
KVWMVLRLYGTENLQKYIRNHISLAERFEALVREDPRFEIVTPRIFSLVCFRLLPSRKNEDG  
GNRLNQSLLDVNASGNIFISHTVLSGKYILRFVAGAPLTEEKHINSAWKLLQDVASTLLAI

**C: The 2 kb genomic DNA sequences upstream of the initiation codon.**

**>CsaV3\_1G036910**

TTCAAAATTGGATCACAAAATTTATTAAGGGATAATTTAGTTTTGTATGGTTTGTGATG  
TTCATTCTACTAGAATGCATGGTATTATATAGAGGGAGTTGGAAGGTGAGTTTTCTTTTT  
TAAAAATTACATGGAGTAAAATAAATTAAATTTAGTTCCCTAAAATATATTTAAAGTATT  
ATACATATCTGCTACCTTGTTTTCTAGCAATTATTTGGTGTTTAAATTGTGTTTAGTATGTT  
TTATTATTATATTTATATTTAATTGAAGATTGACTAAATTTTGAATTTAACTCAGAAAAA  
AAAAGTAAGTACCCACAGACTAAAATTTTGATTTCAAAAAATAGATCATTACAAATCT  
ACAAACCTAATTCCTATCATTTATTTGGTGTTTAATTTGTTTAATTATATTTATATTTAATG  
GAAGATGTGAAATTTTGAATTTAACGTAGAAAATGATCGTGCCACACGCAACAAGTTA  
ATTATCCTACCAAACCTAAGATGTGACATGATAATATAACAACTCCAATTAATTGACT  
ATCAAATTTATGGCCATTTTCTAAAAAGATGCAATTAAACCTTTTCATTGTAAACATATT  
TAAAAATAAAATATGAATGTCCTATTTTTGTCTTAAATTTTGTATCTTGTTCTAAAAGTC  
ACCAAACCTTTTAAAAACCTTTATTTTGGTTGTCAAACCTTCTGAAAAAGTTTACTTTGTA

CATGTTGTTAGAGTTCCTTAACTTTAAGGAAATGATTGTTTGACTTCTATATTTGATTAA  
TTAGGCCACACTTCATCTTATTAATTAATAATTATAGAACCAAGAAATCTGGCTAATTTAT  
ATGCCAAAATAAAGACATAATCAATACACTTGAATCAAATAAATCAAAATTAATAATCTA  
ATTTTGTCTTTTTCTCCTCAAATTAAGCTTAAATCTTTCACATATCTCTTGACTACCTACC  
CTTTATTTACTTTTCTTCAAATCAAAGGAACAATATTGAGTAGAATAAAAAAATACTTTTC  
AATAAAGACCGACACATATTATTGGTGTAAAAATCCATGACAAGGTAAAAATAAATTAGA  
AAAATAAAATAAGTACAACACATGTATAAAATATACTCTACCAAATTTACATAAATATT  
CACAAAATAAAAAAAGAGAAGAAGAAGAAGAACGGATTGAGTGTCACACCC  
CGTTCTAGGTTTTCTTCTAACCTAGATTGTGGTGTCAACCTACTCTTTAAAAACAAC  
ATTTTCAACCTAACTTCTATAGAACGAGTATTATAAAATTCTCTATAGAACGAGTATTA  
TAAAATTCTACATAAATTTGACAATATCTCCCCTAGAATATGGGTAGCCAAACCTAAA  
AAGAGGTGAAAATTACAGTTCTATACATATATGAGATCTTTGGACACAAAATCCCTTCG  
AGTGTGTCTCACCATGCACTGATCCAACTATTTACAGAGTTCCAAATAGAGTTCATATC  
CAAACCAGATATTAATTACAAAATAATTATAGACTAATGAGGGATTTCTCAAATACATG  
CCCACAACATGTCTCTCGCTATTTCTAGTAGCCTCGTATTGCAATACAAAACCTAAGTAT  
ATACATACAAAGAATGAACTAATCTACAATCAATGACAGGAAACAATGCTTCGTCCAT  
GACCGCTACCTGAAGGAGGGGGAGGTGGGAGGAGGGAGGGGGGAGGGAGAGAGAG  
AGAGAGAAAAAAAACATTGAAAACGTGAGCTAAAACCTCAGTGAGTGGTAAGTTTTT  
TAGAAGTAAGAGCTCGTAAATATGCTTTTAAAAAATGTATAAATATGCATCAATAATGA  
AATAGTAATTAATAATATTATTATCATATATTACGTAAATCACAGTAATGCTAACAAATCT  
GTGTACGCAATCCAATATGGTAAGGCGCCTAAATATACGGCCAAGAATATCTCACACA  
CGATCAAGGAATCTTGTAGCCAAACCTAAC

**> CsaV3\_3G028450**

TTCTCTGCTCGGACTTCTCGAACTGAGTCCGGTGAGATGTTTGAATAATCCGACGAA  
GTAACCAACAATCAATGGTGAAGCGGATAGATAACGAAGACGACGATGGTATCGATTG  
GATATTATTATTCACGCCAATTATCAATTTCAATATCGAACTTTTAGCATCATTTTACACTT  
CCATTATAACTCTTTTTTAATATTGTTTTAGTGGAATTAATATTGTGTTAGTGGAATTTT  
GTCCTTCAATATAAAATGTGGAAGTTGATTAACTTTTTAACCTCATTTTCCCTAATCATT  
TAACTCCTTGTAAGTATTGTTTGAGTGGTAATTAATGTATGTTGAATTCTTAACTTTTAC  
CACCTTATTAAAAAAATTAATCTATAAACGTGTATTAGTTAATAATGTAATTCATTATGT  
AACCAATTCCATGAAACGACGGAAGACCAATAACAAAATACACTTTCTTAAAAATG  
AAAAACTCAAAATTTAATGAAATTTGTATTAAATAAATGTTGAAAGACATAAAATTAA  
CAAAACCAATAAAAAAATTTTAAAATGTGACTCGTGGGTACTAACAATTTTCTTTTTG  
AAATAAAGATAAACATATGAGACAACCTTTAAATAAAGTTTCTAAAACCATGGATCTTTC  
CTGTCACTCGTCAGATTCCTGAATCATCTACTTTTGCTTGAAAGATTAAACATAGAAAAT  
AATGAATATATAAAGATACCCAATAAGGGACTCACTACTAGTTACGCTAGGTGTATGTA  
ACTTTTCAATAAGACTTCGTGAGGAGGTACCCGAACTATCGTTTGTCCGATGGAACAC  
ACGCAATCTAGTGATCCTGAAGAAACACTCTCATTTATCGATGAACCCAAAGGAACAC  
CTATGTATCGGGCTATAGTGATCTCGTCGAACCACTCATAAACATAACATGACAGTATTA  
TGGTCGACACACACTGTCATAAATTTGTGAAAATGTGGTGATCCCGAGGGACTCCCAT  
GTGGATATAACCTTAATAGACAAAGTTTACATAACATCTATCCATAGCATGTAGCATCAT  
CATAAACATTGCATGAATATTAATCATAACATCCTTAATCATGTGATTAAATATCATGTAT  
CATGAACATCATAAACATATTAGTCATCATCATCAACATAATATCATAATCATCATCAACG  
TCATATTATGCATTTTAGTTTTTCATCAATGCATAACCTTAAATACATGCAAGCTCTTAAAT

TCATGTTCGAATGTCCAGTAGTATAATCTCTTATCTGAGAGATTTGCCAAACAAAATACT  
TTTTAGCTTACAATAAAAAATTTCAATTGATCTTAAAAATTTAGGTTGAAACCAATTCAA  
CCTTGATGGAAAAAATTCATCATTTAAACCTTCAAGATTTGCTAAAGGGGCCTTCCAAA  
GGCAATCAACCAAAAAACAATTCCAATAATACTTAATTTAGAGTCTCAATTAATTAACCT  
TTAATGCGTATTAAAAATTTACAATAAAGATCCAAAACACTCACCAATATGAAACACT  
GAGCATTGGATATAAAAACCATGTTATAACAAGACTCAAAGAACACAACCTCAATAG  
CCCCAGAACCAATTTAATATCAACCCCTAAGGTAGGCTAGATTGAGTTACTTAGGTGAG  
CTAAGAAACCAAGGATCGAACAAAGTTAGCAACTCCCATCAACCCTCGATCTTCAAAG  
CACTCCACAAGTAAGGTATATAAATTTCACTTGCATGTTCCAAATATTCATCTATCTATCA  
CAAGAACAAAATTCTACATTTTAAAATTTTCAGACTTCATTCCTCCAAAATCTTGTTTTT  
TTAAATATGAAAATTACAACCCTATTTATAGTAATTAATAATGAAATAAAAGGTCACAA  
CATTTTATTTTATGCCCTTTCAACTACCATAATTAATGAAAACACATAAGTACATAATTC  
TTAGACATTTAATTTTATGACTTTTGAG
